# Supplementary material for: Intra-Specific Diversity of Leishmania major Isolates: A Key Determinant of Tunisian Zoonotic Cutaneous Leishmaniasis Clinical Polymorphism
Source: MDPI journal article supplement (doi:10.3390/microorganisms10030505), 2022-02-25
Supplement: s1 [file s1]

## Supplementary Materials

**Table S1.** List of the *L. major* Tunisian isolates, the villages where they were isolated from, and the calculated severity score in corresponding human patients. Mnara and Mbarkia villages are considered as old foci, whereas Ksour, Dhouibet, and Msadia are considered as newly emerging foci. Isolates were harvested between October and March, the period in which the lesions of most individuals infected during the ZCL transmission period appear.

| Isolate ID | Origin   | Severity Score in the Human Patient |
|------------|----------|-------------------------------------|
| 0193       | NA       | NA                                  |
| 0437       | Mnara    | 2.013                               |
| 0670       | Mbarkia  | 19.956                              |
| 0757       | Mbarkia  | 6.46                                |
| 0796       | Mbarkia  | 14.991                              |
| 1004       | Dhouibet | 19.233                              |
| 1006       | Dhouibet | 6.009                               |
| 1133       | Dhouibet | 16.498                              |
| 1290       | Dhouibet | 0.28                                |
| 1292       | Dhouibet | 2.374                               |
| 1392       | Dhouibet | 1.277                               |
| 1830       | Msadia   | 1.963                               |
| 1889       | Msadia   | 1.216                               |
| 1948       | Msadia   | 0.484                               |
| 2229       | Ksour    | 0.174                               |
| 2458       | Ksour    | NA                                  |
| 2704       | Ksour    | NA                                  |
| 2938       | Ksour    | 3.93                                |

NA: not available.

**Table S2.** Different tested lectins, their specificities, and the final concentrations of their specific inhibitor sugars.

| Lectin  | Origin                         | Specificity                                | Inhibitor Sugar          | Final Concentration of Inhibitor Sugar |
|---------|--------------------------------|--------------------------------------------|--------------------------|----------------------------------------|
| PNA     | <i>Arachis hypogaea</i>        | Galactose                                  | D-(+)-Galactose          | 2 M                                    |
| Jacalin | <i>Artocarpus integrifolia</i> | $\alpha$ -D-galactopyranoside              | D-(+)-Galactose          | 2 M                                    |
| LcH     | <i>Lens culinaris</i>          | $\alpha$ -D-mannose<br>$\alpha$ -D-glucose | D-(+)-Mannose            | 2 M                                    |
| SBA     | <i>Glycine max</i>             | N-acetyl-D-galactosamine                   | N-acetyl-D-galactosamine | 1 mM                                   |

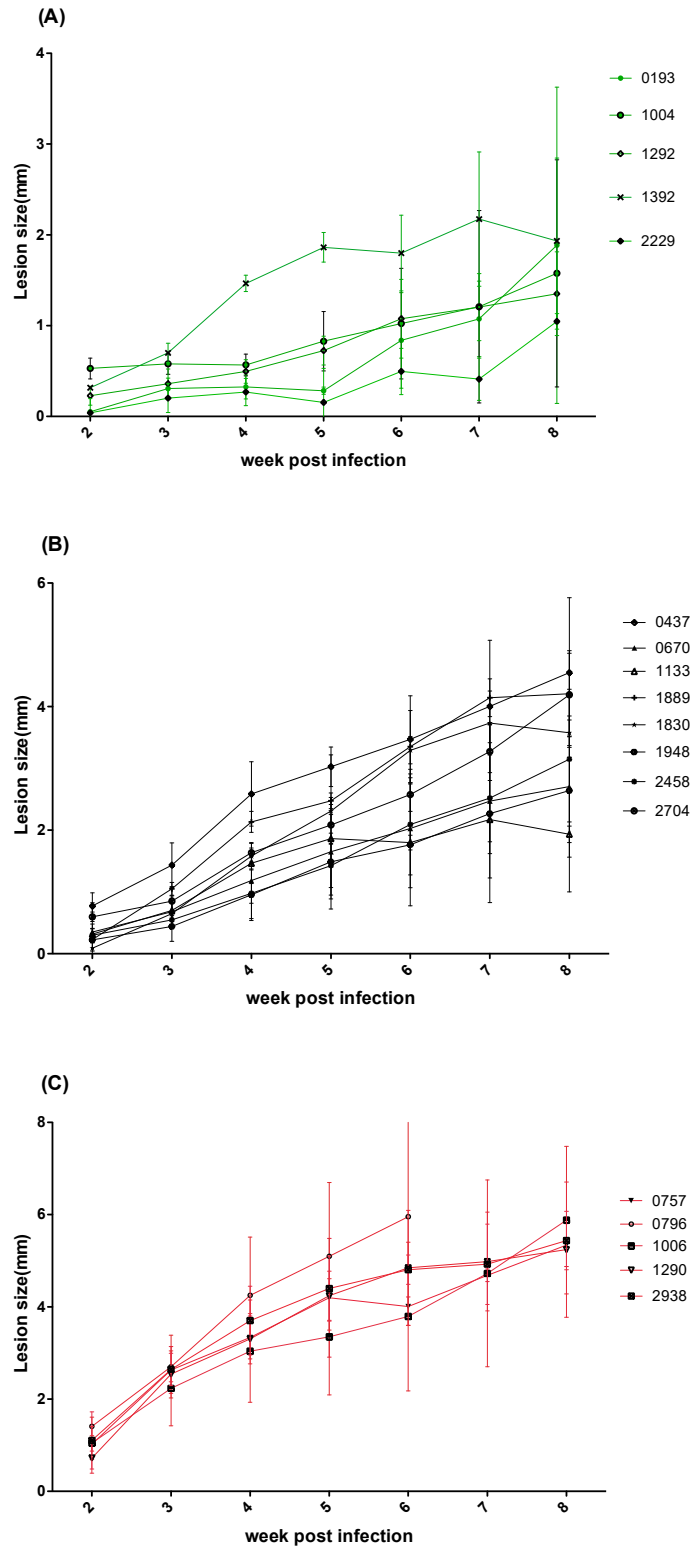

**Figure S1.** Lesion size of BALB/c mice footpads infected with low (green, panel A), middle (black, panel B), and high (red, panel C) pathogenic *L. major* isolates. Lesion size was monitored using the caliper every week during 8 weeks. For each isolate, a group of six mice was infected. The mean and standard deviation of the six mice were presented for each isolate. The results correspond to those obtained from one representative experiment out of two performed with six mice for each isolate.
